# Supplementary material for: Substrate stiffness modulates extracellular vesicles’ release in a triple-negative breast cancer model
Source: PubMed Central journal article supplement (PMC11648499; doi:10.20517/evcna.2024.47), 2024-09-29
Supplement: evcna-5-3-553-SupplementaryMaterials.pdf [file evcna-5-3-553-SupplementaryMaterials.pdf]

## Supplementary Materials

### **Substrate stiffness modulates extracellular vesicles' release in a triple-negative breast cancer model**

**Beatrice Senigagliesi<sup>1,2,3</sup>, Otmar Geiss<sup>3</sup>, Stefano Valente<sup>3,4</sup>, Hendrik Vondracek<sup>2</sup>, Nicola Cefarin<sup>5</sup>, Giacomo Ceccone<sup>3</sup>, Luigi Calzolari<sup>3</sup>, Laura Ballerini<sup>1</sup>, Pietro Parisse<sup>2,5</sup>, Loredana Casalis<sup>2</sup>**

<sup>1</sup>Neuroscience Area, Scuola Internazionale Superiore di Studi Avanzati, Trieste 34136, Italy.

<sup>2</sup>Nano-Innovation Laboratory, Elettra-Sincrotrone Trieste S.C.p.A., Trieste 34149, Italy.

<sup>3</sup>Institute for Health and Consumer Protection, European Commission - Joint Research Centre, Ispra 21027, Italy.

<sup>4</sup>Department of Physics, University of Trieste, Trieste 34127, Italy.

<sup>5</sup>Istituto Officina dei Materiali, Consiglio Nazionale delle Ricerche, CNR-IOM, Trieste 34149, Italy.

**Correspondence to:** Dr. Loredana Casalis, Dr. Pietro Parisse, Nano-Innovation Laboratory, Elettra-Sincrotrone Trieste S.C.p.A., s.s. 14 km 163,5 in Area Science Park, Trieste 34149, Italy. E-mail: Loredana.casalis@elettra.eu; parisse@iom.cnr.it;

Dr. Laura Ballerini, Neuroscience Area, Scuola Internazionale Superiore di Studi Avanzati, Via Bonomea 265, Trieste 34136, Italy. E-mail: ballerini@sissa.it;

Dr. Luigi Calzolari, Institute for Health and Consumer Protection, European Commission - Joint Research Centre, Via Enrico Fermi 2749, Ispra 21027, Italy. E-mail: CALZOLAI@ec.europa.eu

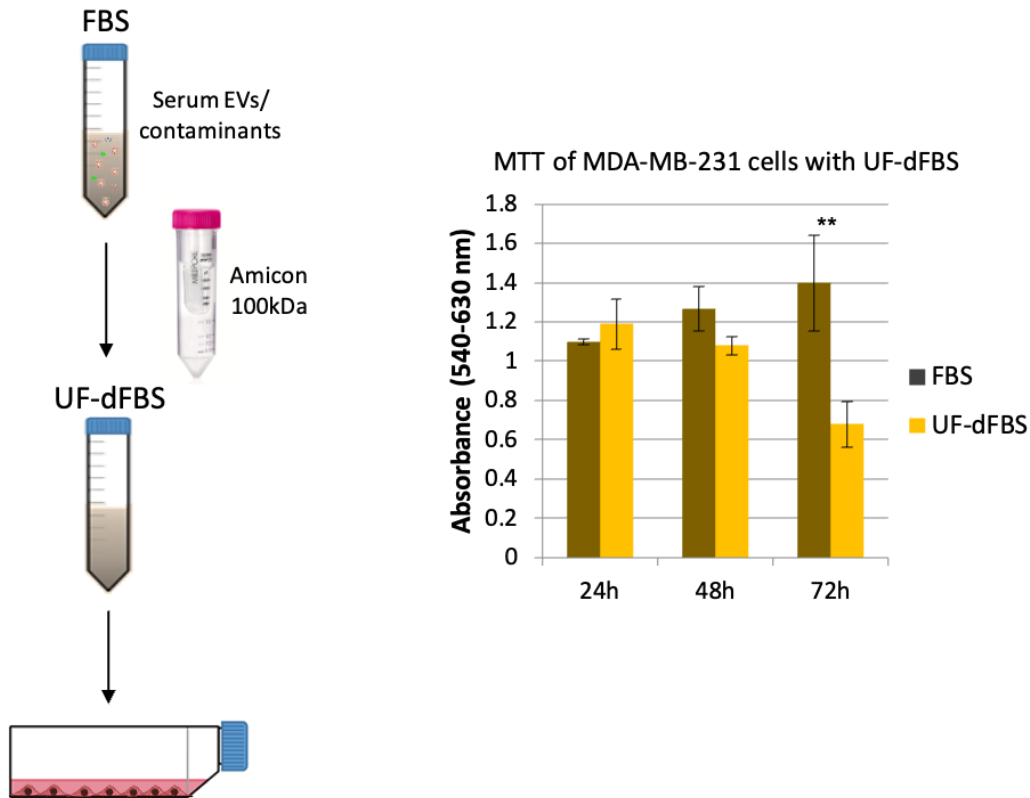

**Supplementary Figure 1.** MTT assay showing the cell vitality of MDA-MB-231 cells grown with UF-dFBS for 1,2,3 days. Significance of data differences was established via two-tailed Student's t-test. UF-dFBS: Ultrafiltrated EV-depleted FBS.

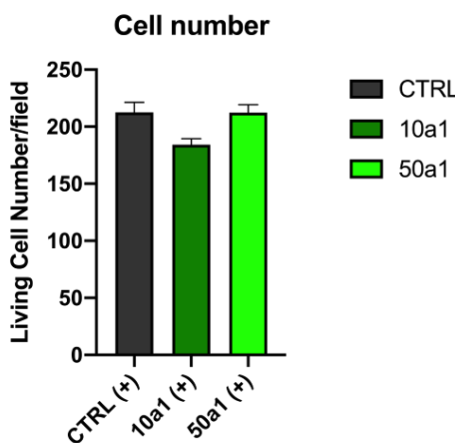

**Supplementary Figure 2.** Cell Number assay showing the cell proliferation of MDA-MB-231 cells grown on substrates at different stiffness. Significance of data differences was established via Ordinary one-way Anova test.

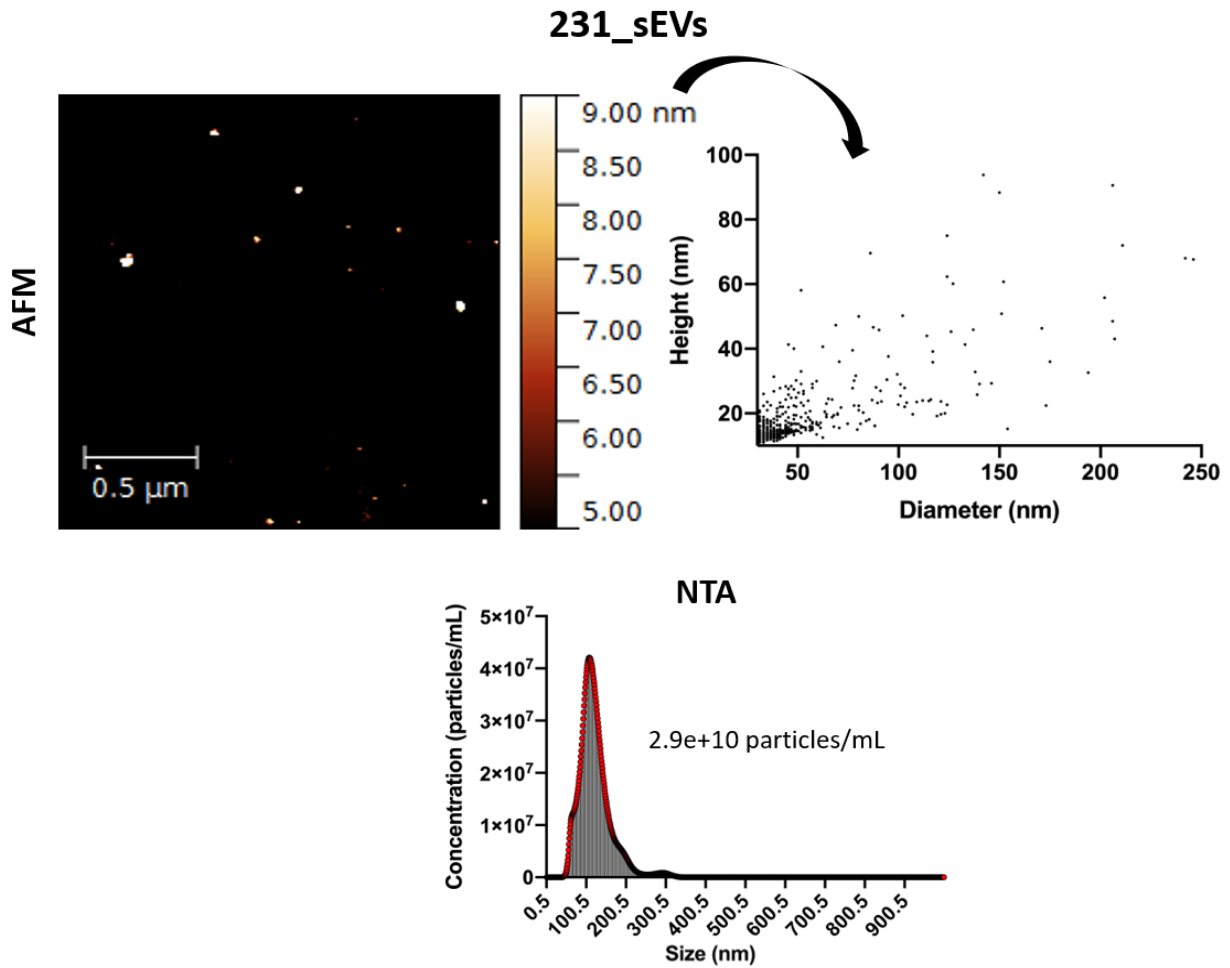

**Supplementary Figure 3.** MDA-MB-231-derived sEV (231\_sEVs) characterization: a representative atomic force microscopy image, scatterplot showing height and diameter obtained from the analysis of AFM images, and NTA. AFM: Atomic force microscopy; NTA: nanoparticle tracking analysis.

## Method flow diagram

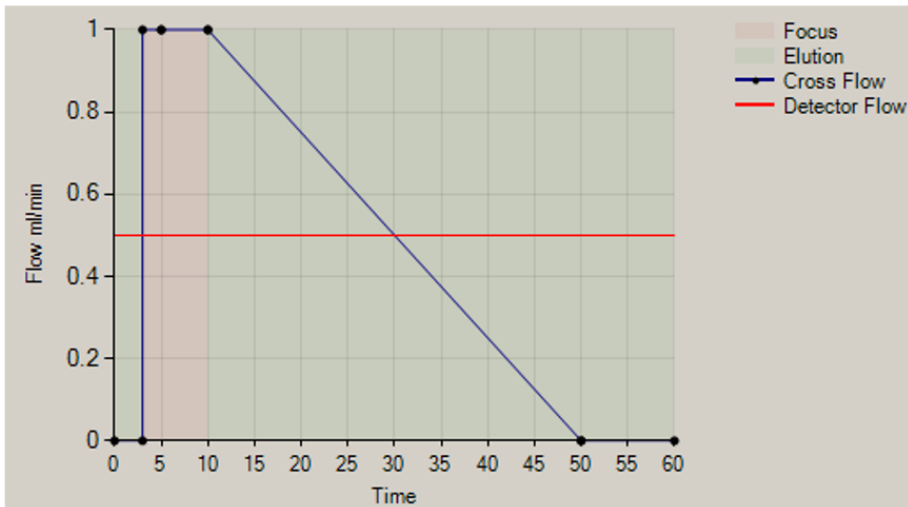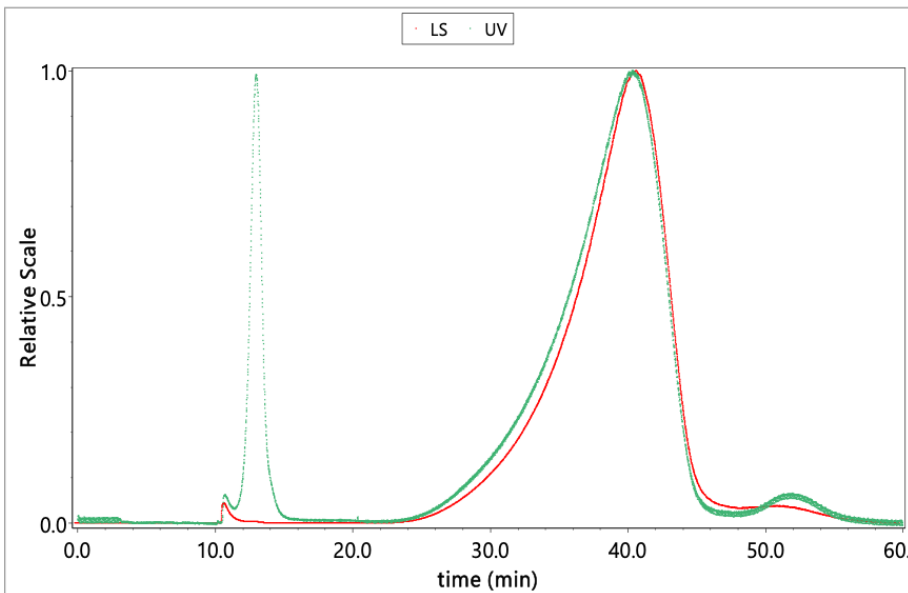

**Supplementary Figure 4.** Method flow diagram used for the AF4-MALS measurements and the AF4-MALS fractogram of the reference material (BSA + liposomes) using this method (on bottom). The graph shows the MALS signal ( $90^\circ$  scattering angle, LS 5) in red and the UV absorbance at 280 nm in green. AF4: Asymmetric flow field-flow fractionation; MALS: multi-angle light scattering.

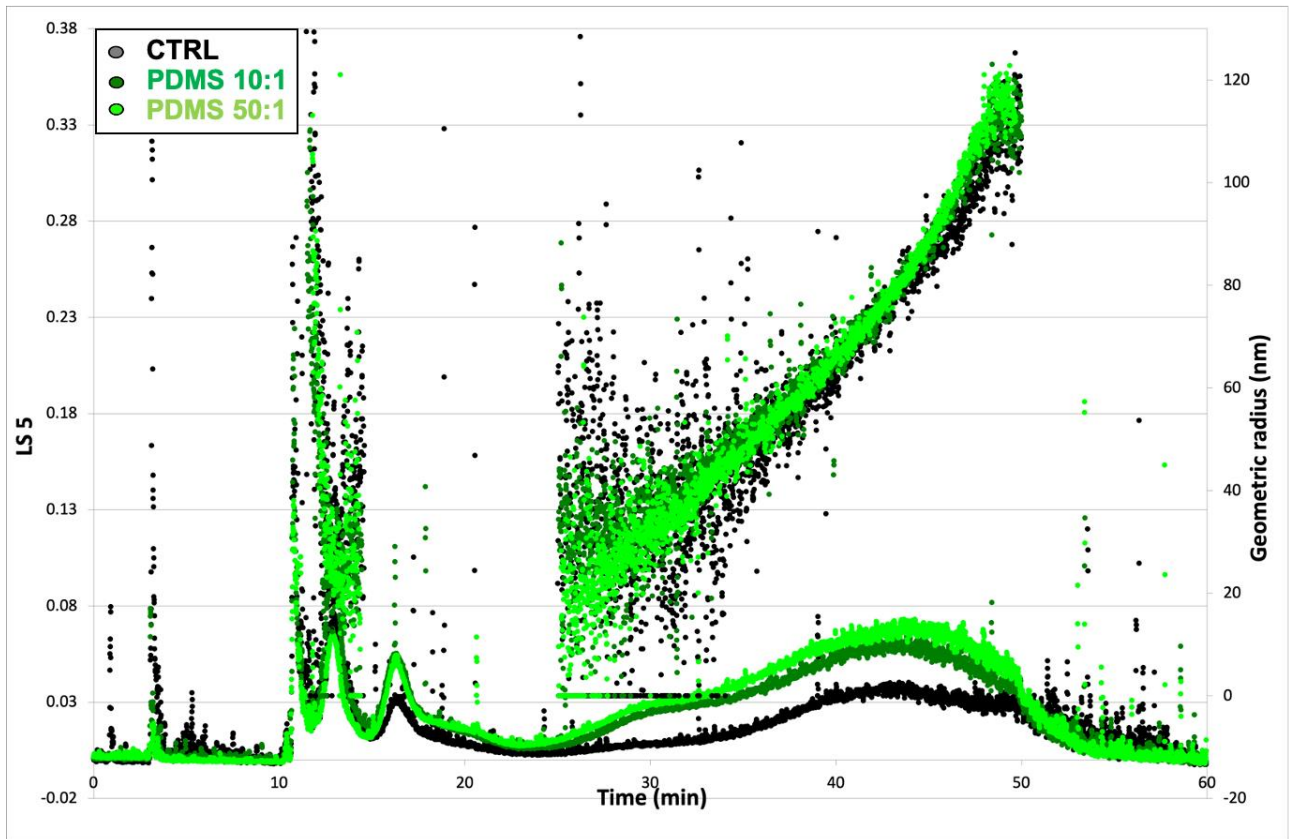

**Supplementary Figure 5.** AF4-MALS fractograms of 231\_sEVs stored at  $-80^{\circ}\text{C}$ . AF4: Asymmetric flow field-flow fractionation; MALS: multi-angle light scattering.
